# Supplementary material for: The hippocampal extracellular matrix regulates pain and memory after injury
Source: PubMed Central journal article supplement (PMC6294737; doi:10.1038/s41380-018-0209-z), 2018-09-26
Supplement: 41380_2018_209_MOESM1_ESM.pdf [file 41380_2018_209_MOESM1_ESM.pdf]

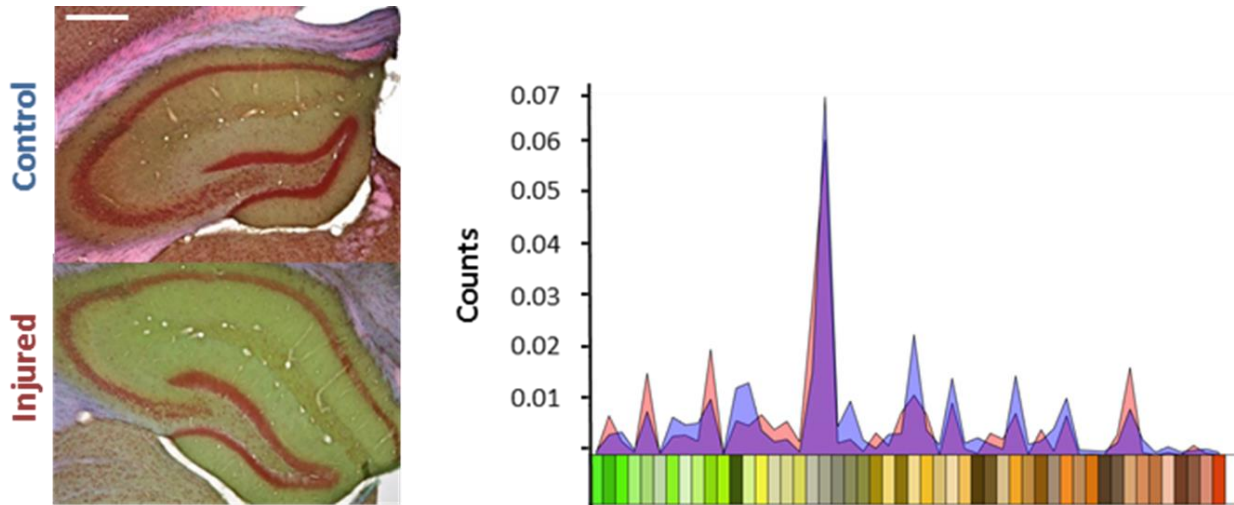

**Figure S1: Hippocampal proteoglycan content is altered in injured mice.** Histological analysis of proteoglycan content shows significant changes in color composition in injured mice (Student's t-test, n=5-8mice/group). Scale bar=400  $\mu$ m.
