# Supplementary material for: The hippocampal extracellular matrix regulates pain and memory after injury
Source: PubMed Central journal article supplement (PMC6294737; doi:10.1038/s41380-018-0209-z), 2018-09-26
Supplement: 41380_2018_209_MOESM3_ESM.pdf [file 41380_2018_209_MOESM3_ESM.pdf]

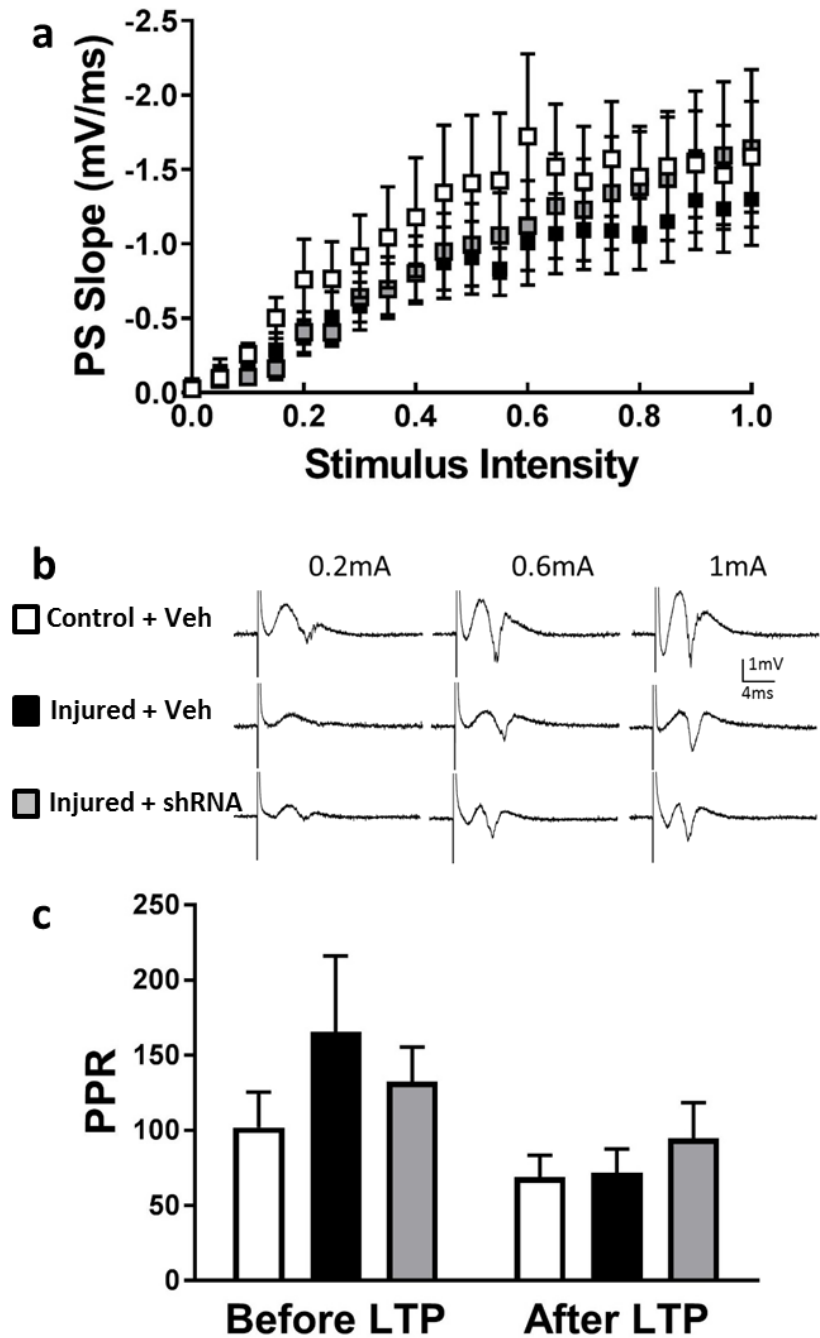

**Figure S3: Peripheral injury is not linked to diminished synaptic transmission or neurotransmitter release probability in the hippocampus.** (a, b) Seven weeks post injury, control and injured groups do not differ in their dentate gyrus input/output curves, suggesting that the efficiency of synaptic transmission is comparable between the 2 groups. MMP8 downregulation in the injured group was not associated with any change (2-way ANOVA, n=13/group). (c) Similarly, no differences in EPSP paired-pulse ratio (PPR; 50 ms interval) were observed among the 3 groups, implying no changes in the release probability of neurotransmitters after injury and/or treatment (2-way ANOVA, n=13/group). Error bars are s.e.m.
