# Supplementary material for: The hippocampal extracellular matrix regulates pain and memory after injury
Source: PubMed Central journal article supplement (PMC6294737; doi:10.1038/s41380-018-0209-z), 2018-09-26
Supplement: 41380_2018_209_MOESM4_ESM.pdf [file 41380_2018_209_MOESM4_ESM.pdf]

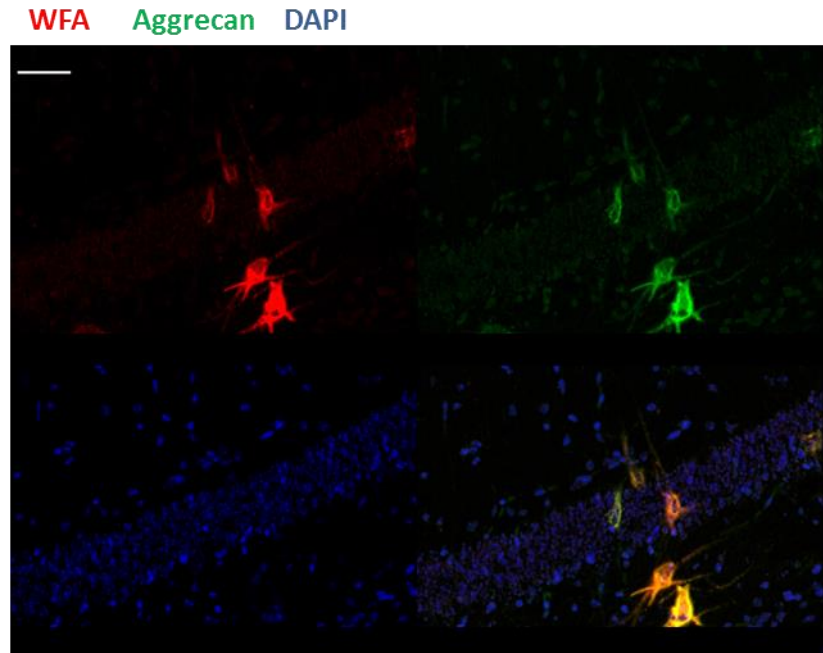

**Figure S4: Aggrecan co-localizes with WFA.** Aggrecan is a key component of the specialized extracellular matrix known as the perineuronal net (WFA stain). Scale bar=50 $\mu$ m.
