# Supplementary material for: The hippocampal extracellular matrix regulates pain and memory after injury
Source: PubMed Central journal article supplement (PMC6294737; doi:10.1038/s41380-018-0209-z), 2018-09-26
Supplement: 41380_2018_209_MOESM5_ESM.pdf [file 41380_2018_209_MOESM5_ESM.pdf]

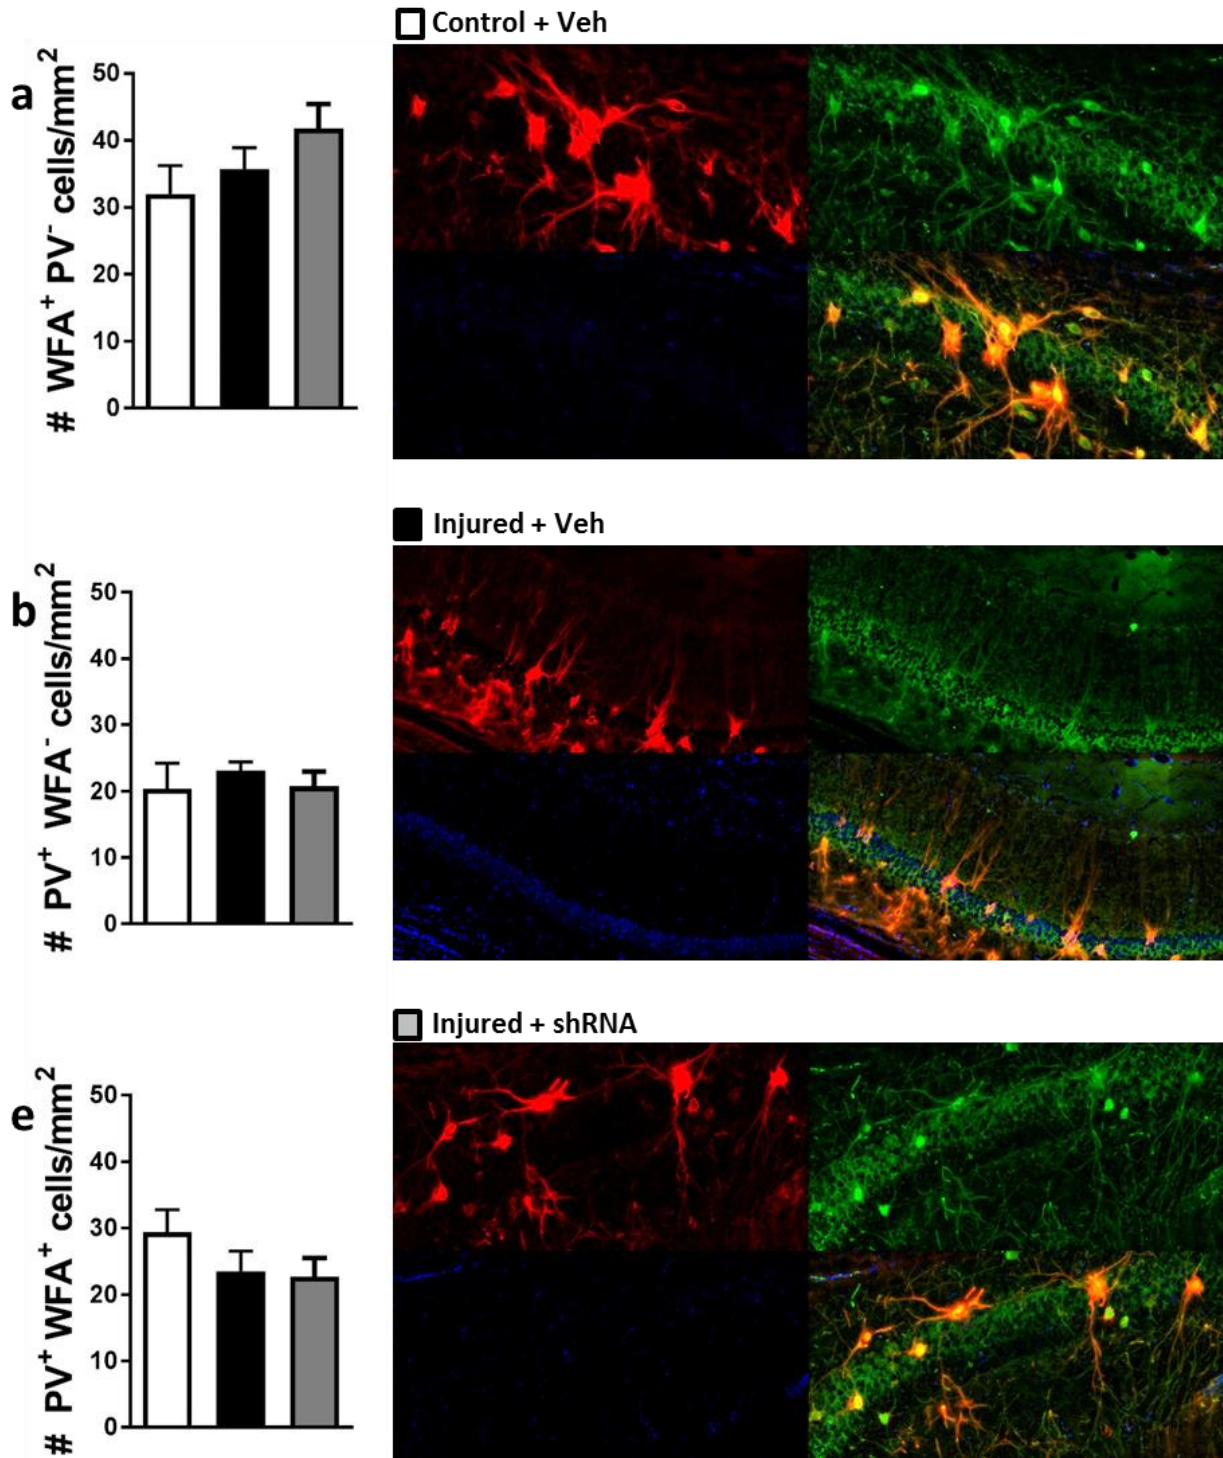

**Figure S5: Injury is not linked with alterations in the number of stable inhibitory interneurons in the hippocampal CA region.** (a-c) Injury is not linked to changes in the number of WFA<sup>+</sup> PV<sup>-</sup>, WFA<sup>-</sup> PV<sup>+</sup>, or WFA<sup>+</sup> PV<sup>+</sup> cells in the CA region of the hippocampus (One-way ANOVA, n=6-8 mice/group). No significant effects of MMP8 downregulation (shRNA treatment) were observed. Scale bar=200 $\mu$ m. Error bars are s.e.m.
